# Supplementary material
Source: PubMed Central journal article supplement (PMC4248695)

## Supplemental Figures

**Figure S1.** DAmP septin alleles do not affect RNA accumulation of *CDC3*, *CDC10*, *CDC11*, *CDC12*, or *SEP7*. (A) The expression of *CDC3* and *CDC12* in yeast cells was tested in WT, three independently-isolated *CDC3-DAmP* strains (JRB412, JRB413, and JRB415 from left to right), and two independently isolated *CDC12-DAmP* mutant strains (JRB418 and JRB419 from left to right). (B) The RNA accumulation of *CDC10*, *CDC11*, and *SEP7* was monitored by QrtPCR in WT (DAY185), *CDC3-DAmP* (JRB412), and *CDC12-DAmP* (JRB419) strains grown in log phase. RNA levels that are statistically significant ( $P < 0.05$ ) from WT data are marked with an asterisk.

**Figure S2.** Septin DAmP mutant strains have filamentation defects on solid surfaces. The wild type strain (DAY185), *CDC3-DAmP* (JRB412), and *CDC12-DAmP* (JRB419) mutant strains were spotted onto 10% fetal bovine serum (FBS) or RPMI-MOPS agar plates and incubated at 37°C for 4 (FBS) or 8 days (RPMI). Images of edges of representative single colonies are shown.

Figure S1

A.

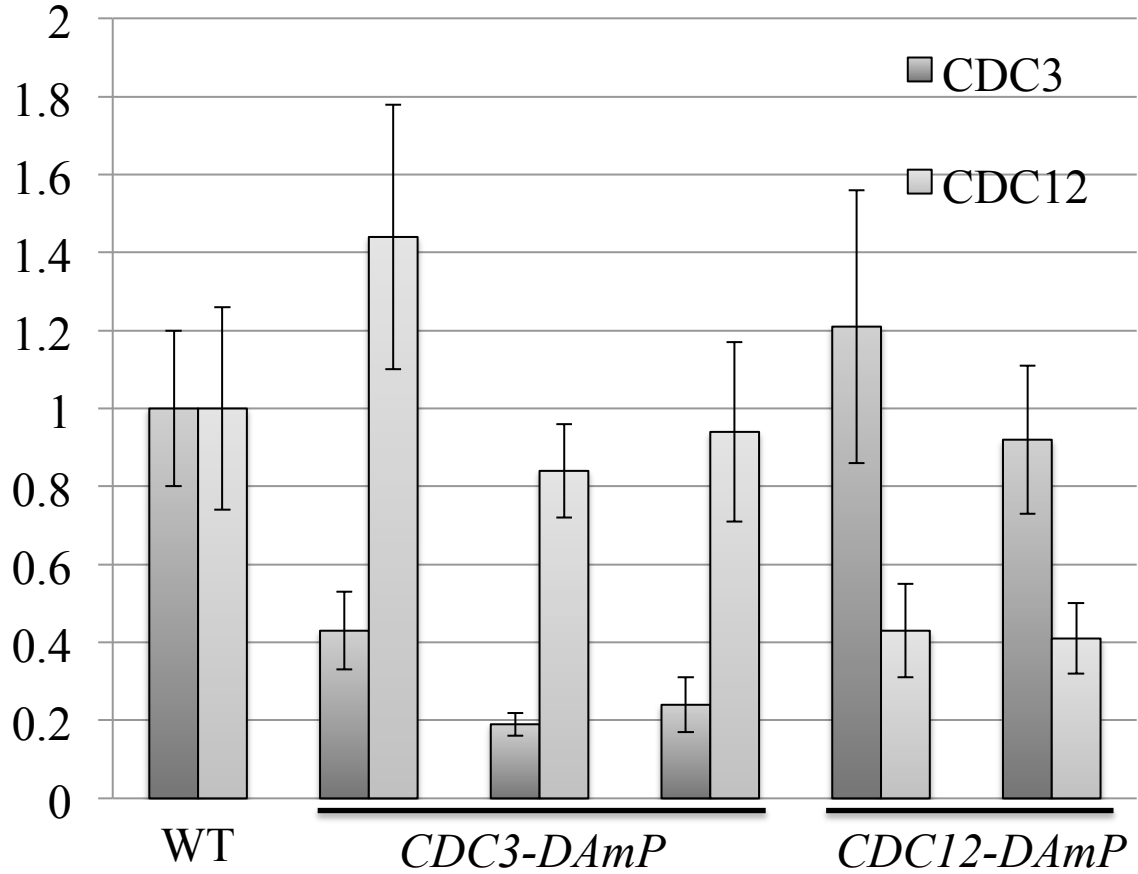

B.

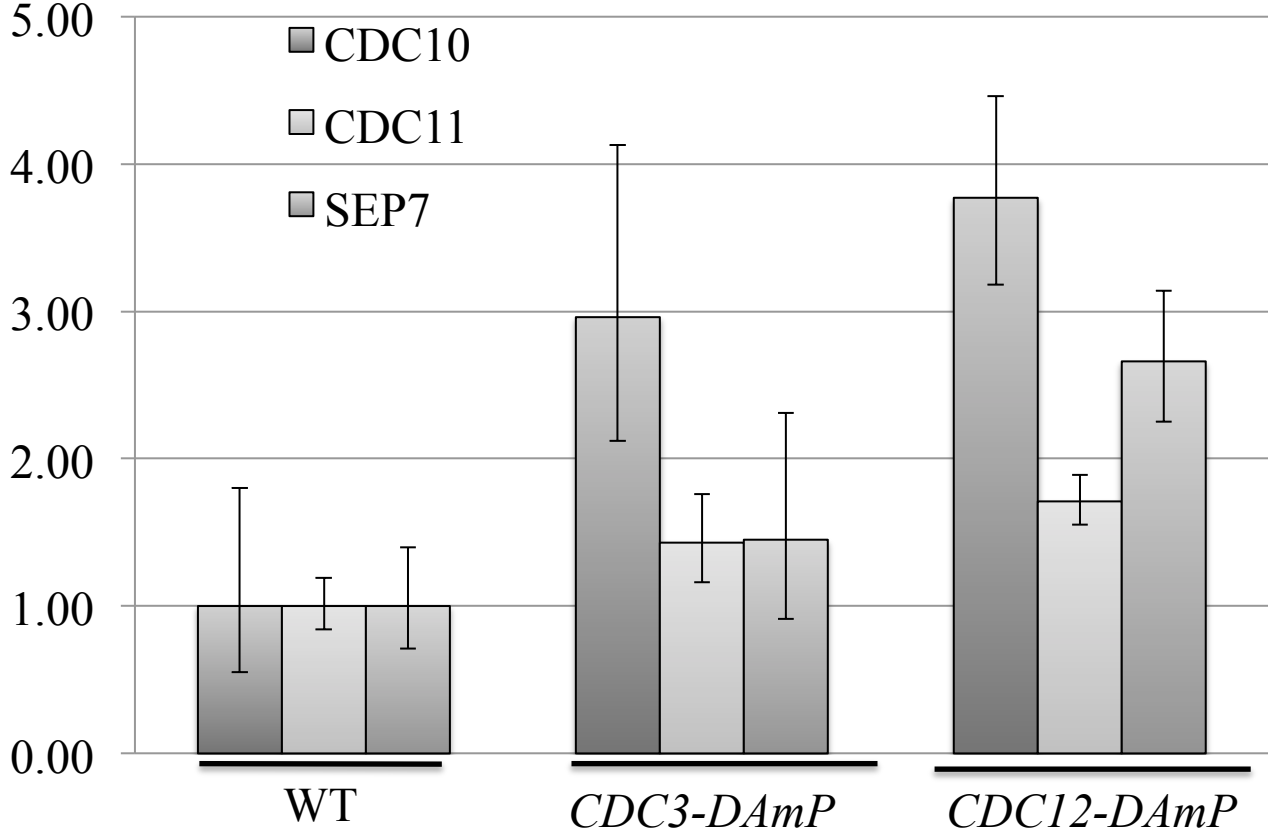

Figure S2

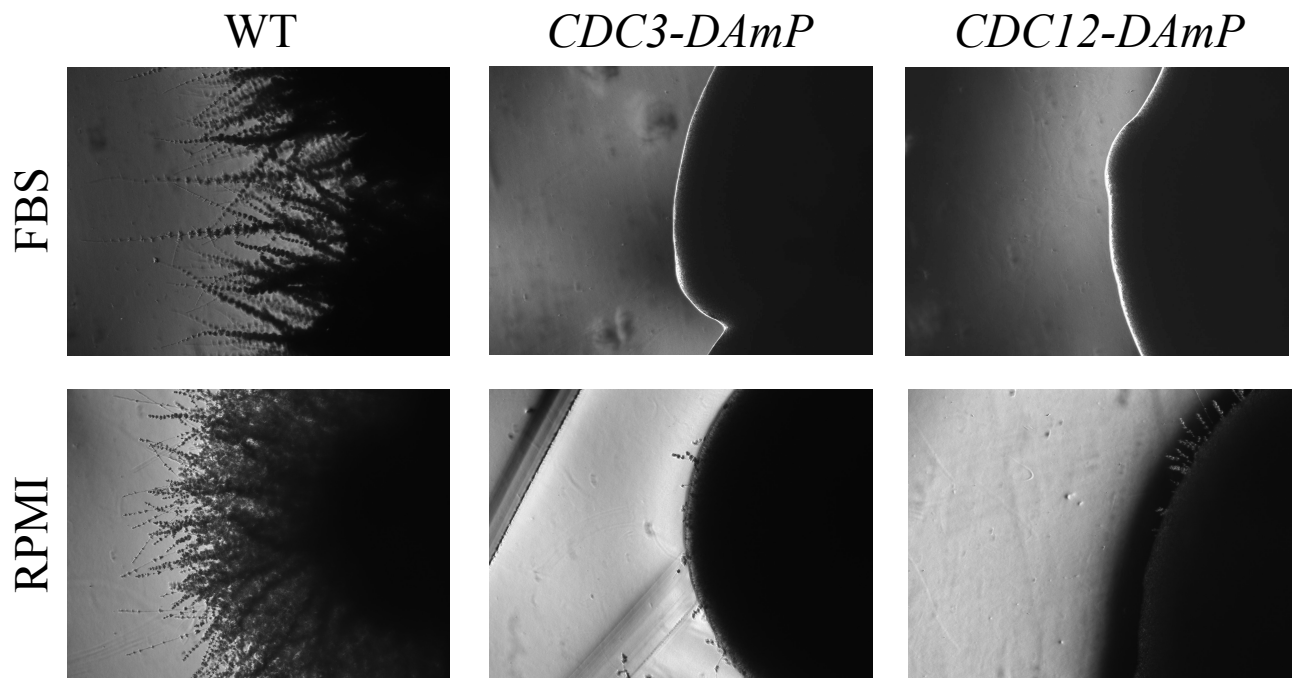

Supplement: EC.00127-14_zek999094355so1.pdf [file EC.00127-14_zek999094355so1.pdf]
